# Supplementary material for: Two-step deposition of Ag nanowires/Zn2SnO4 transparent conductive films for antistatic coatings
Source: Royal Society of Chemistry journal article supplement (doi:10.1039/d1ra00427a), 2021-01-01
Supplement: d1ra00427a1.pdf [file d1ra00427a1.pdf]

## **Two-step deposition of Ag nanowires/Zn<sub>2</sub>SnO<sub>4</sub> transparent conductive electrodes for antistatic coatings**

Jing Li<sup>a,b</sup>, Fengmei Chen<sup>b</sup>, Haidong Li<sup>b\*</sup>, Hongwen Zhang<sup>a</sup>, Gang Wang<sup>c</sup> and Daocheng Pan<sup>c\*</sup>

*<sup>a</sup>School of Materials Science and Engineering, Changzhou University, Changzhou, Jiangsu 213164, China;*

*<sup>b</sup>College of Material and Textile Engineering, Jiaying University, Jiaying, Zhejiang 314001, China;*

**E-mail:** hdlipr@163.com

*<sup>c</sup>State Key Laboratory of Rare Earth Resource Utilization, Changchun Institute of Applied Chemistry, Chinese Academy of Sciences, 5625 Renmin Street, Changchun, Jilin 130022, China*

**E-mail:** pan@ciac.ac.cn

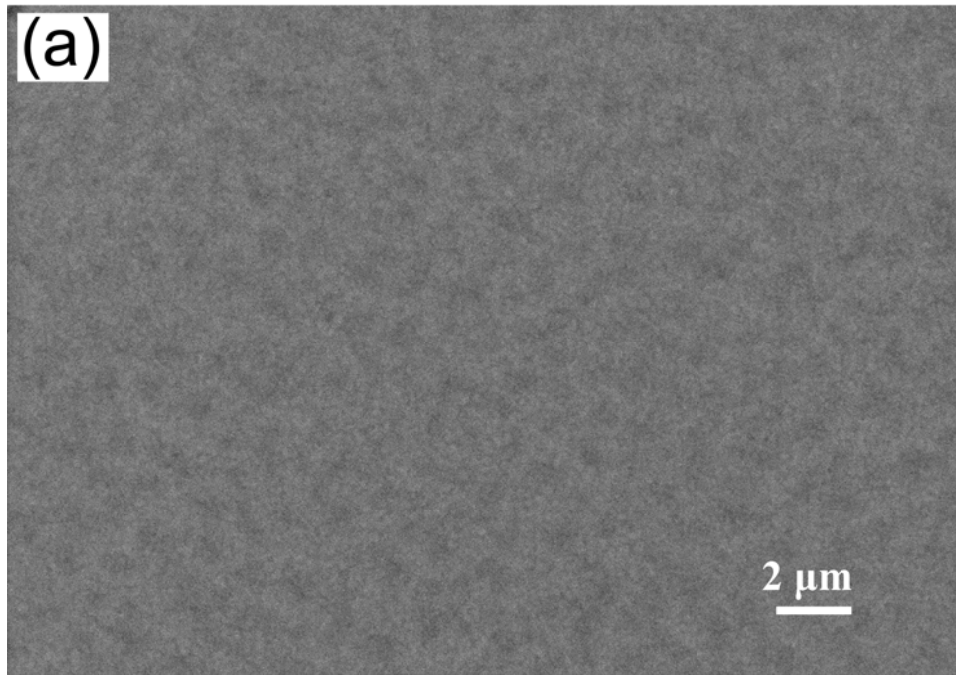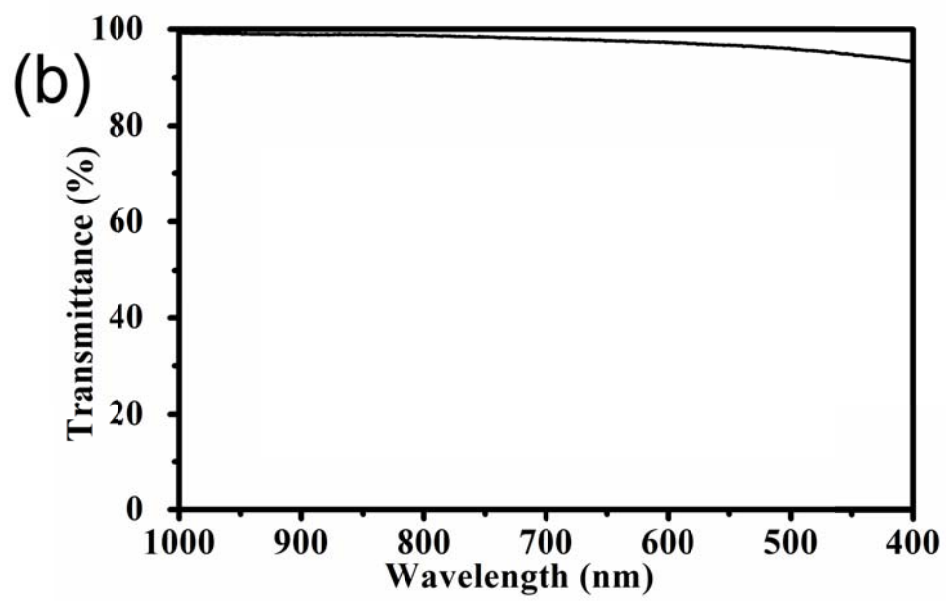

**Fig. S1.** SEM image (a) and transmission spectrum (b) of a pure  $\text{Zn}_2\text{SnO}_4$  film.

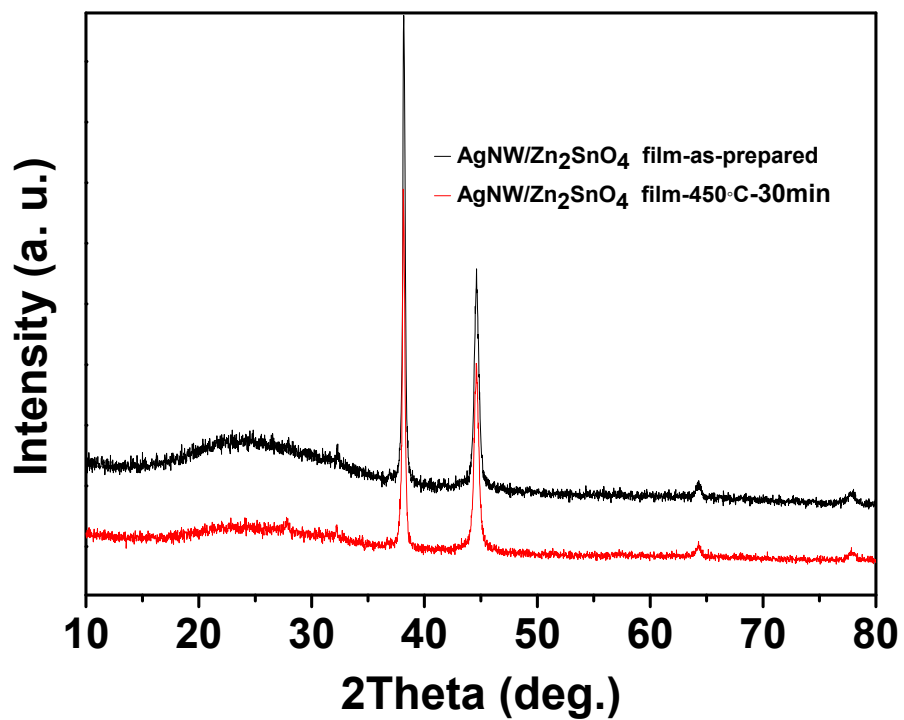

**Fig. S2.** XRD patterns of as-prepared AgNW/Zn<sub>2</sub>SnO<sub>4</sub> composite thin film and the corresponding thin film annealed at 450°C for 30min.

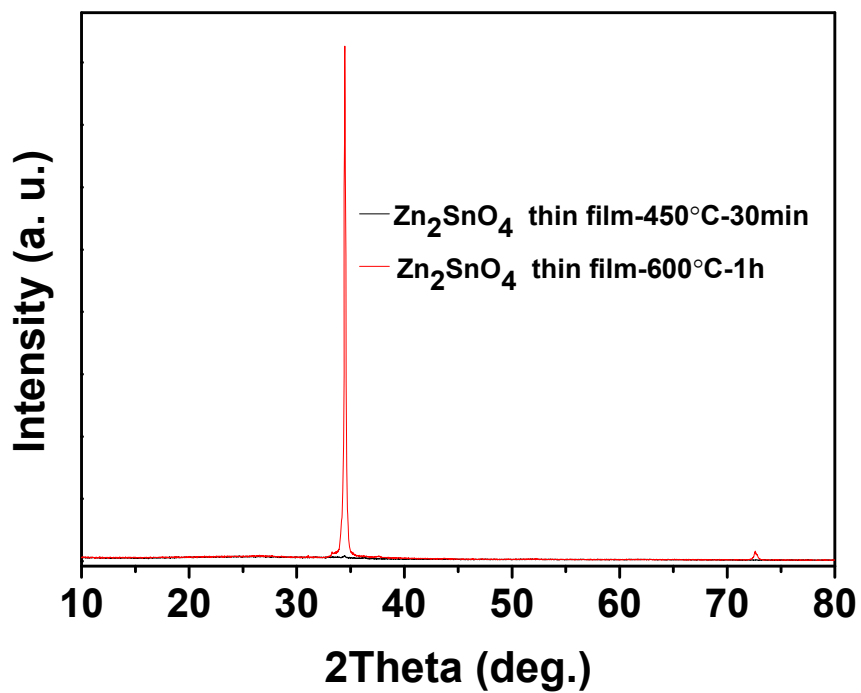

**Fig. S3.** XRD patterns of pristine Zn<sub>2</sub>SnO<sub>4</sub> thin films (~1.8 μm) annealed at 450 and 600 °C, respectively.

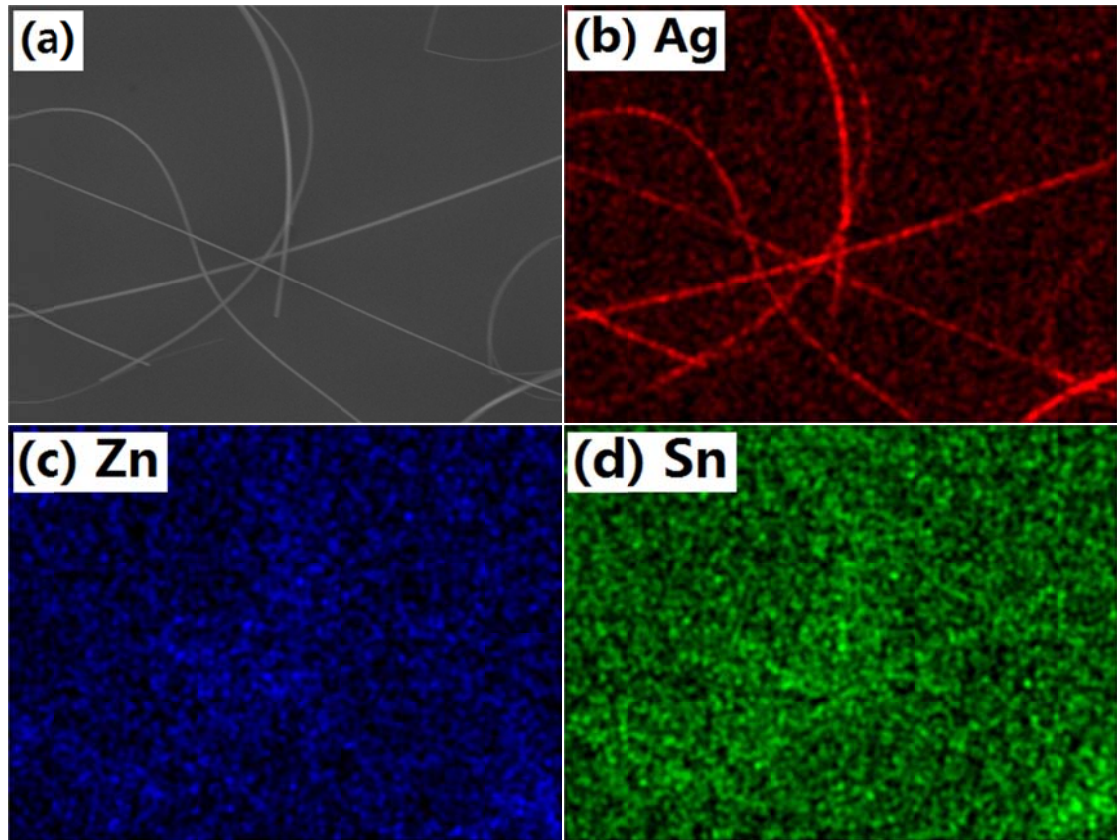

**Fig. S4.** SEM image (a) and corresponding elemental maps (b, c and d) of as-prepared AgNW/Zn<sub>2</sub>SnO<sub>4</sub> composite thin film on silicon wafers.

**Table S1.** The relationships between the thickness of the  $Zn_2SnO_4$  layer and the concentration of  $Zn_2SnO_4$  precursor solution as well as the spin-coating rate.

| Thickness of the $Zn_2SnO_4$ layer (nm) |              |                |              |               |
|-----------------------------------------|--------------|----------------|--------------|---------------|
|                                         | 1 mL ethanol | 2.5 mL ethanol | 5 mL ethanol | 10 mL ethanol |
| 2000 rpm, 10 s                          | 855          | 335            | 156          | 56            |
| 2600 rpm, 10 s                          | 770          | 293            | 120          | 51            |
| 2600 rpm, 20 s                          | 629          | 250            | 64           | 24            |
